# Supplementary material for: Time to Recurrence and Survival in Serous Ovarian Tumors Predicted from Integrated Genomic Profiles
Source: PubMed Central journal article supplement (PMC3207809; doi:10.1371/journal.pone.0024709), 2011-11-03
Supplement: pone.0024709.s004.pdf [file pone.0024709.s004.pdf]

# Time to Recurrence and Survival in Serous Ovarian Tumors Predicted from Integrated Genomic Profiles

*Parminder K. Mankoo, Ronglai Shen, Nikolaus Schultz, Douglas A. Levine and Chris Sander*

## **mRNA Gene Expression**

Data from three different microarray expression platforms (Agilent 244K, Affymetrix Exon and Affymetrix U133A) were combined and normalized as reported in the TCGA paper [1]. All 11,864 genes from the unified TCGA dataset (derived from genes represented on all three platforms) were utilized for Cox Lasso regression analysis. All mRNA expression datasets were mean-centered. Mean-centered expression values were calculated by subtracting the mean expression value across patients from the gene estimate and dividing by the standard deviation across patients.

***External data preparation*** Four external mRNA expression datasets were used to evaluate the performance of TCGA-data based signatures:

*Tothill data:* mRNA expression data for 243 tumor samples and 17255 genes [3]. We used only the 174 high-grade serous ovarian cancer samples to match the TCGA cohort.

*Dressman data:* mRNA expression data with overall survival information for 117 tumor samples and 12113 genes [4].

*Bonome data:* mRNA expression data for 166 tumor samples and 12114 genes [5]. Overall survival data was available for 163 patients and progression free survival data for 138 patients (clinical data as of February 4, 2008).

*Yoshihara & Tanaka data:* mRNA expression data for 110 patients and 18177 probes [6]. For each gene with multiple probes, we selected the probe with the largest sum of the squares of the individual expression values, resulting in 13154 unique genes.

*Progression Free Survival:* At  $\lambda=.830$ , we selected 181 features (Table ST4 [7]), cv.CPE = 0.79. Tertile stratification on the training data led to a p-value of 0.17 (c-score) and t-score stratification led to a p-value of 0.05, CPE.test = 0.77. Using the Tothill data set, tertile stratification based on c-score led to a p-value = 0.035 (and t-score p-value = 0.012) and CPE.tothill = 0.77. Our gene signature was not applicable to the Yoshihara & Tanaka dataset, as gene expression values were only available for 112 of the 181 genes in the progression-free-survival signature (Figure 1SA, 1SB).

*Survival:* At  $\lambda=.839$ , we selected 219 features (Table ST5 [8]), cv.CPE= 0.81. Tertile stratification based on c-score led to a p-value = 0.70 and t-score stratification led to a p-value of 0.09, CPE.test = 0.80. Using the Bonome dataset, tertile stratification led to a p-value = 0.05 (c-score) and p=0.18 (t-score) and CPE.bonome=0.75; using the Tothill dataset, tertile stratification led to a p-value = 0.048 (c-score) and p=0.014 (t-score), and CPE.tothill= 0.78; and using the Dressman dataset, tertile stratification led to a p-value = 0.008 (c-score) and p=0.033 (t-score). Our survival signature was not applicable to

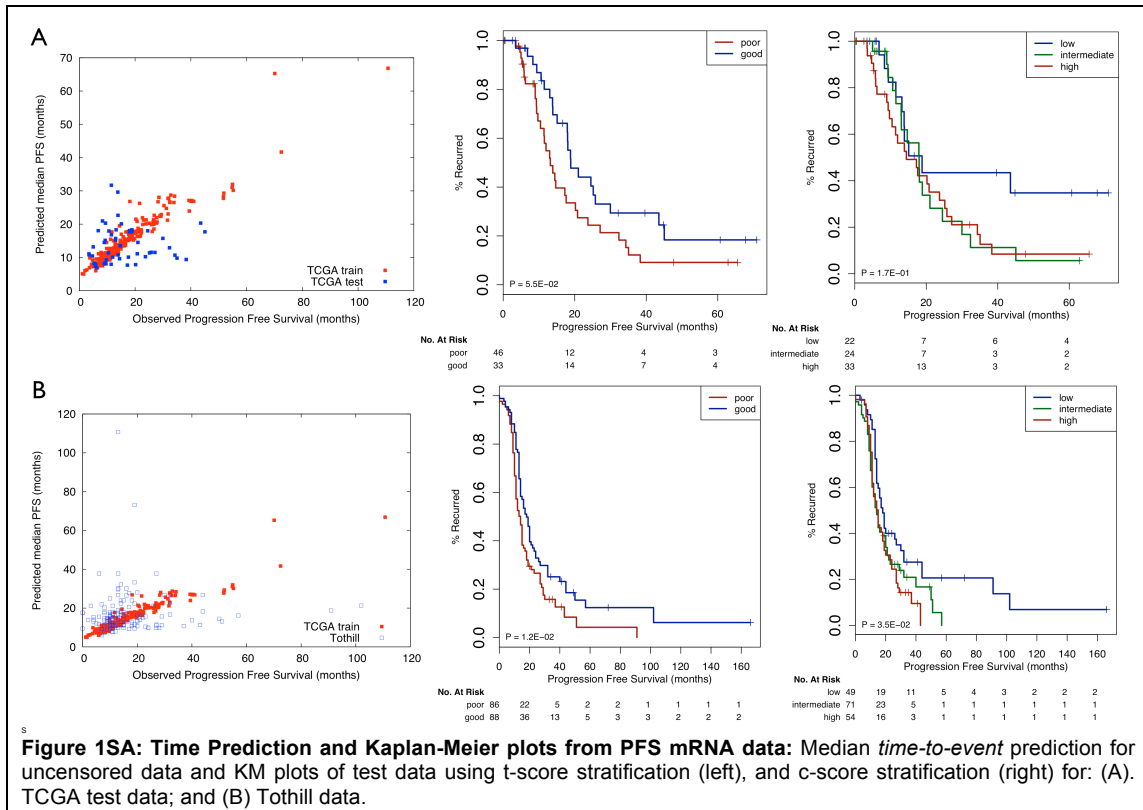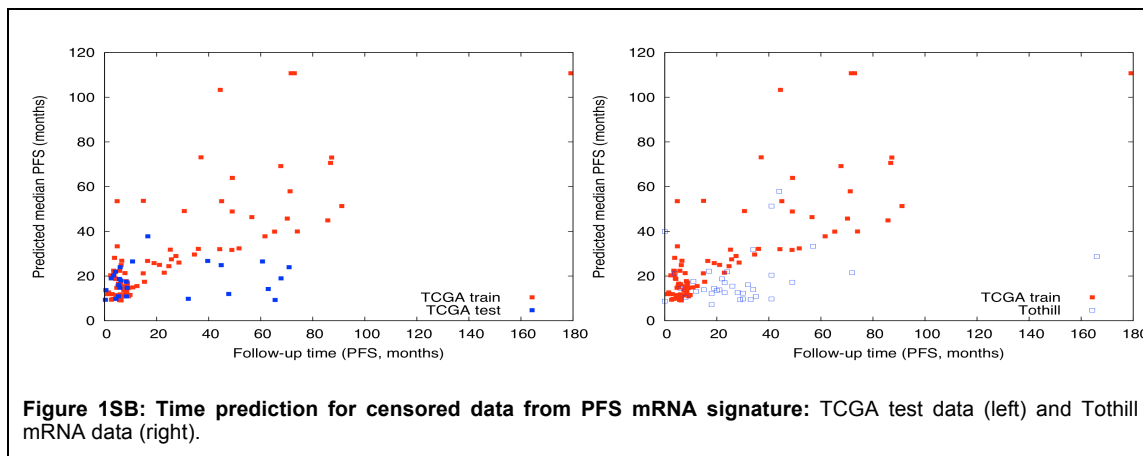

Yoshihara & Tanaka dataset as gene expression values were only available for 143 of the 219 genes in the overall survival signature (Figures 1SC, 1SD).

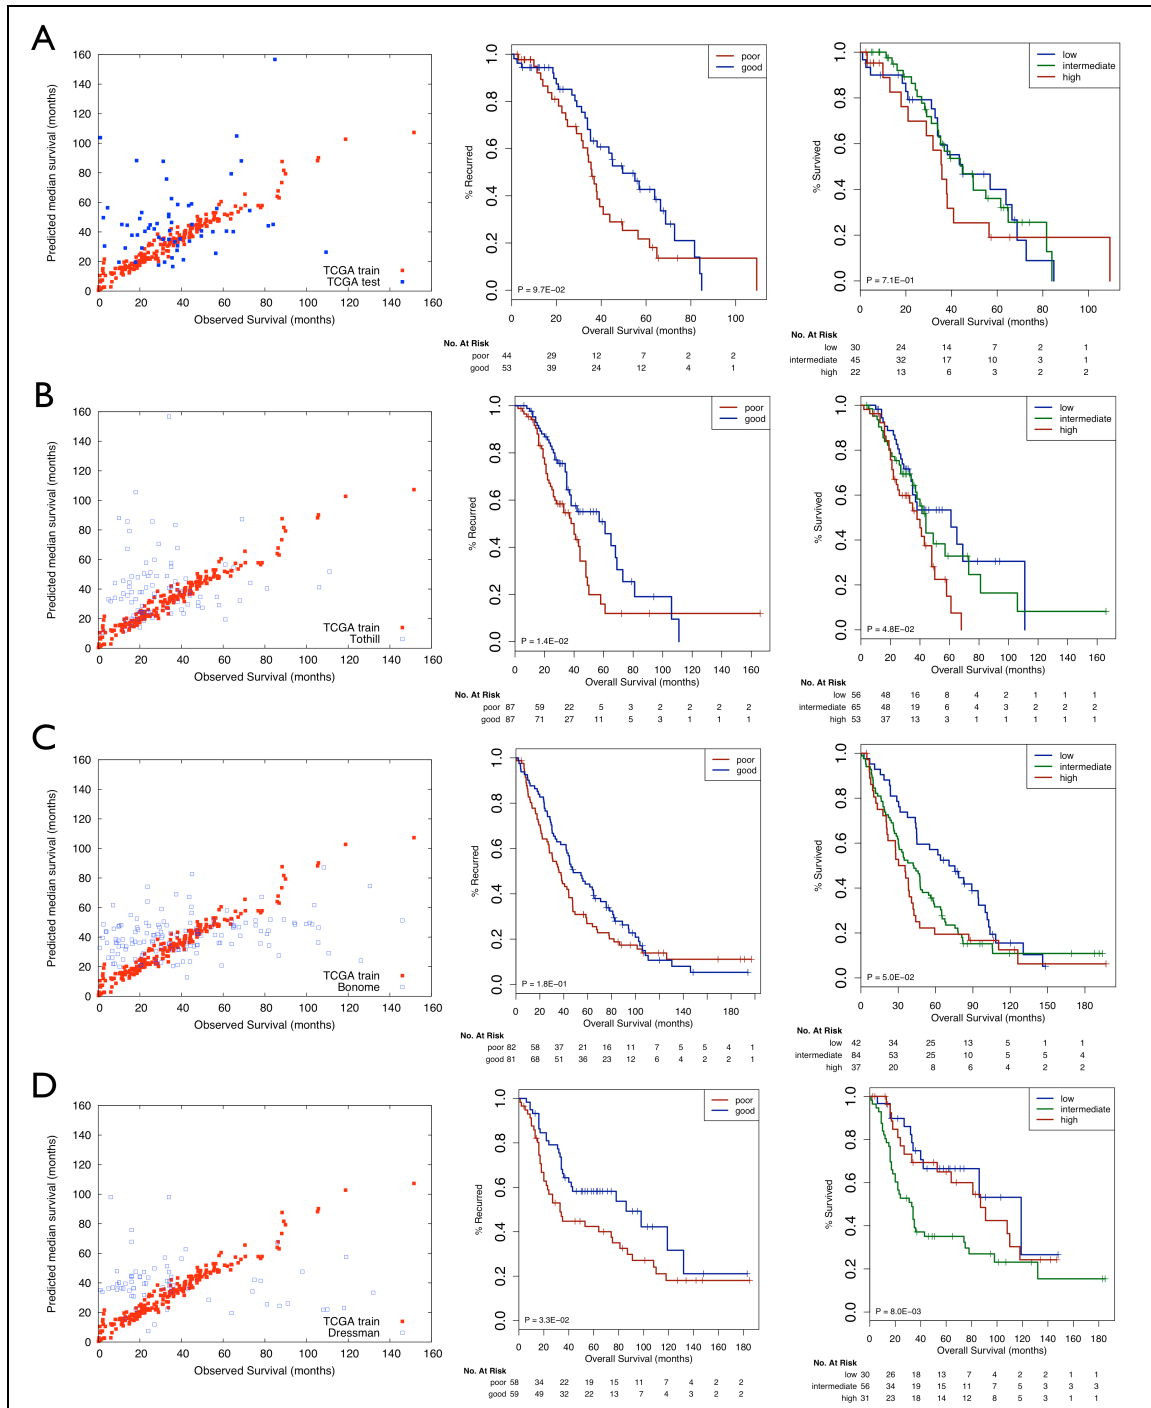

**Figure 1SC: Time Prediction and Kaplan-Meier plots from OS mRNA signature: (A) TCGA test data; (B) Tothill dataset; (C) Bonome dataset and (D) Dressman dataset. KM plots using t-score (left) and c-score (right).**

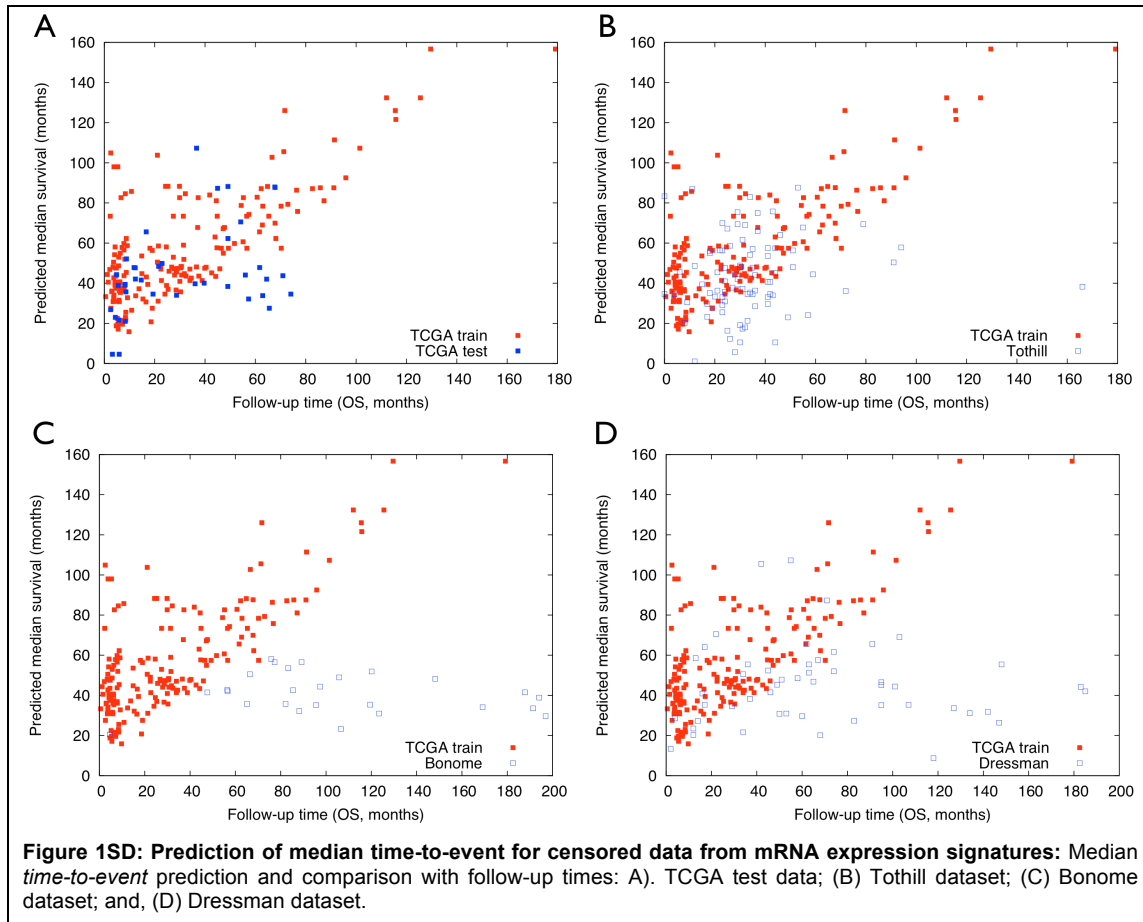

### ***Functional and Disease association for genes in mRNA signatures***

In order to prioritize functionally relevant genes and statistically and significantly associated canonical pathways within our mRNA signatures, we utilized Ingenuity pathway analysis (IPA) [7].

***mRNA PFS signature:*** The top significant canonical pathways from mRNA TTP signature include: Granzyme A signaling; cardiomyocyte differentiation via BMP receptors; glycerolipid metabolism; Angrin interactions at neuromuscular junction; B cell development; HER-2 signaling in breast cancer and such (Figure 1SE). Other important categories (not statistically significant) were Androgen signaling and DNA double-strand break repair by homologous recombination. Statistically significant biological function categories include cell-to-cell signaling and interaction; molecular transport; lipid metabolism; cell death; cancer; and DNA replication, recombination and repair.

mRNA OS signature:

The top significant canonical pathways from the mRNA OS signature include: LXR/RXR activation; IL-6 and IL-10 signaling; PKA and p38MAPK signaling; TNFR1 signaling and PPAR signaling and such (Figure 1SF). General biological function categories (statistically significant) include: Inflammatory disease; lipid metabolism; drug metabolism, reproductive system disease; cell-to-cell signaling and interaction; and DNA replication, recombination and repair etc.

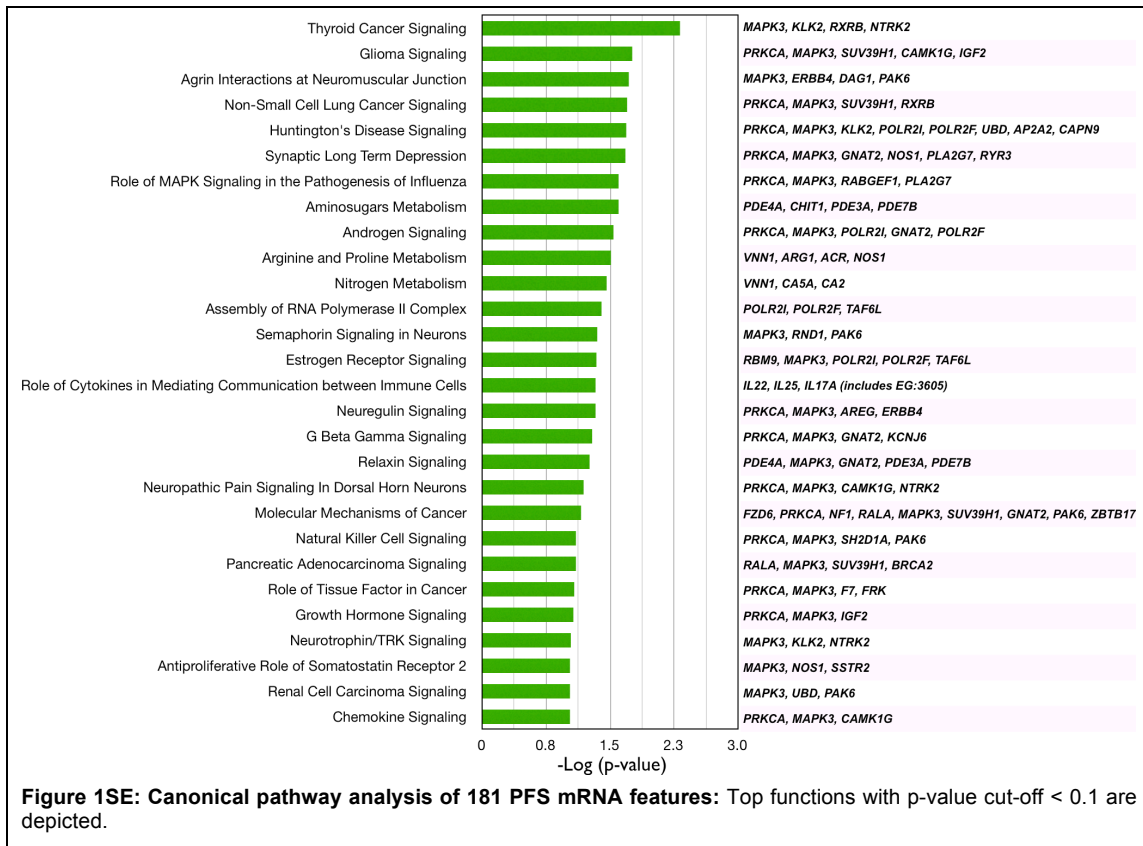

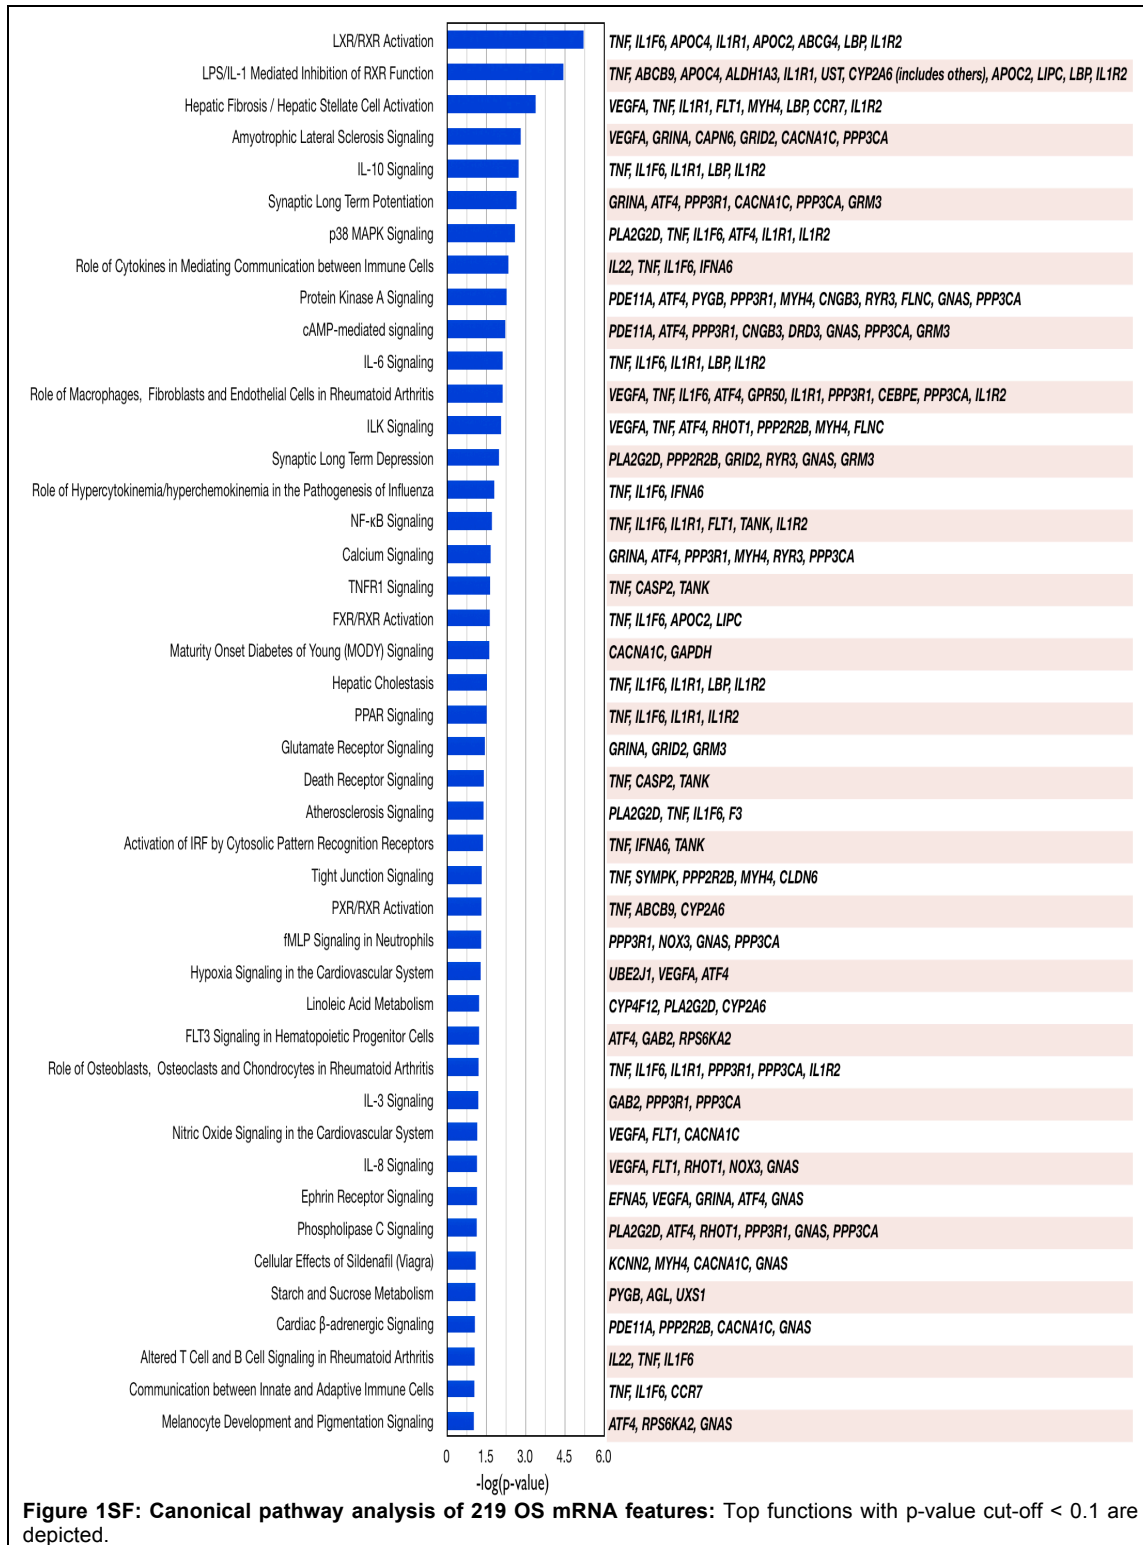

## References:

1. TCGA (2011) Integrated Genomic Analyses of Ovarian Carcinoma. *Nature* 474: 609-615.
2. Park MY, Hastie T (2007) L1-regularization path algorithm for generalized linear models. *J R Statist Soc B* 69: 659-677.
3. Tothill RW, Tinker AV, George J, Brown R, Fox SB, et al. (2008) Novel molecular subtypes of serous and endometrioid ovarian cancer linked to clinical outcome. *Clin Cancer Res* 14: 5198-5208.
4. Dressman HK, Berchuck A, Chan G, Zhai J, Bild A, et al. (2007) An integrated genomic-based approach to individualized treatment of patients with advanced-stage ovarian cancer. *J Clin Oncol* 25: 517-525.
5. Bonome T, Levine DA, Shih J, Randonovich M, Pise-Masison CA, et al. (2008) A gene signature predicting for survival in suboptimally debulked patients with ovarian cancer. *Cancer Res* 68: 5478-5486.
6. Yoshihara K, Tajima A, Yahata T, Kodama S, Fujiwara H, et al. Gene expression profile for predicting survival in advanced-stage serous ovarian cancer across two independent datasets. *PLoS One* 5: e9615.
7. <http://cbio.mskcc.org/~mankoo/ST4.txt>
8. <http://cbio.mskcc.org/~mankoo/ST5.txt>
9. IPA Ingenuity Pathway Analysis; <http://www.ingenuity.com>.
