# Supplementary material for: Time to Recurrence and Survival in Serous Ovarian Tumors Predicted from Integrated Genomic Profiles
Source: PubMed Central journal article supplement (PMC3207809; doi:10.1371/journal.pone.0024709), 2011-11-03
Supplement: pone.0024709.s006.pdf [file pone.0024709.s006.pdf]

# Time to Recurrence and Survival in Serous Ovarian Tumors Predicted from Integrated Genomic Profiles

Parminder K. Mankoo, Ronglai Shen, Nikolaus Schultz, Douglas A. Levine and Chris Sander

## microRNA expression

microRNA data was available for 527 samples. These intensities were  $\log_2$  transformed and normalized using Robust Multiarray Averaging (RMA, AgiMicroRNA package in R).

Progression Free Survival: At  $\lambda=.858$ , we selected 81 microRNA features (Table ST8 [1]), cv.CPE = 0.704. Tertile stratification based on training data led to a p-value of 0.09 for the test data (Figures 3SA, 3SB).

Survival: At  $\lambda=.869$ , we selected 87 features (Table ST9 [2]), cv.CPE = 0.71. Tertile stratification based on training data led to a p-value of 0.09 for the test data (Figures 3SA, 3SB).

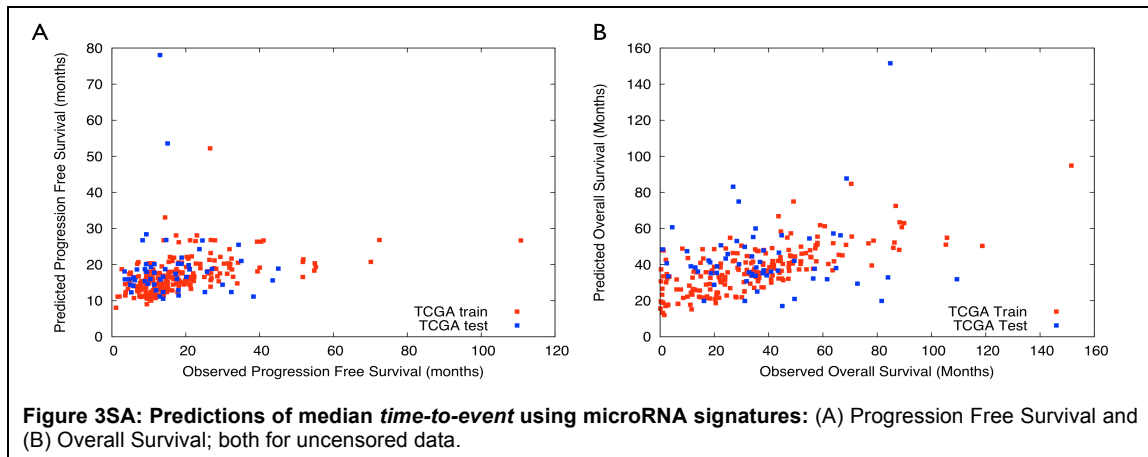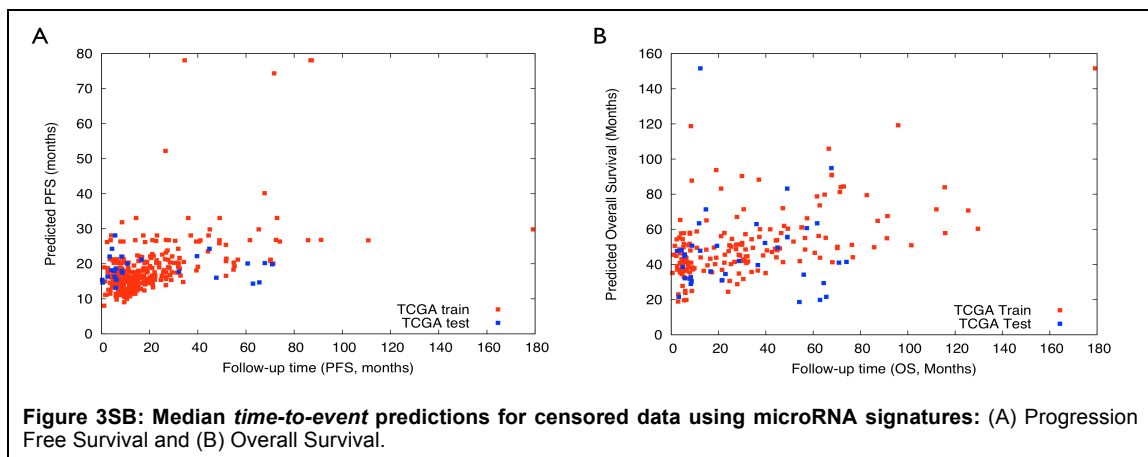

**References:**

[1] <http://cbio.mskcc.org/~mankoo/ST8.txt>

[2] <http://cbio.mskcc.org/~mankoo/ST9.txt>
